# Supplementary material for: Co-Loading of Black Phosphorus Nanoflakes and Doxorubicin in Lysolipid Temperature-Sensitive Liposomes for Combination Therapy in Prostate Cancer
Source: MDPI journal article supplement (doi:10.3390/ijms25010115), 2023-12-21
Supplement: s1 [file s1]

# Co-Loading of Black Phosphorus Nanoflakes and Doxorubicin in Lysolipid Temperature-Sensitive Liposomes for Combination Therapy in Prostate Cancer

Chandrima Das <sup>1</sup>, Cristina Martín <sup>2</sup>, Sebastian Habermann <sup>3</sup>, Harriet Rose Walker <sup>1</sup>, Javed Iqbal <sup>1</sup>, Jacobo Elies <sup>1</sup>, Huw Simon Jones <sup>1</sup>, Giacomo Reina <sup>3,\*</sup> and Amalia Ruiz <sup>1,\*</sup>

<sup>1</sup> Institute of Cancer Therapeutics, School of Pharmacy and Medical Sciences, Faculty of Life Sciences, University of Bradford, Bradford BD7 1DP, UK; c.daschandrima@gmail.com (C.D.); h.r.walker@bradford.ac.uk (H.R.W.); javediqbal.georgian@gmail.com (J.I.); j.eliesgomez@bradford.ac.uk (J.E.); h.s.jones@bradford.ac.uk (H.S.J.)

<sup>2</sup> Department of Bioengineering, Universidad Carlos III de Madrid, 28911 Leganés, Spain; cristima@ing.uc3m.es

<sup>3</sup> Empa Swiss Federal Laboratories for Materials Science and Technology, Lerchenfeldstrasse 5, 9014 St. Gallen, Switzerland; sebastian.habermann@empa.ch

\* Correspondence: giacomio.reina@empa.ch (G.R.); g.ruizestrada@bradford.ac.uk (A.R.)

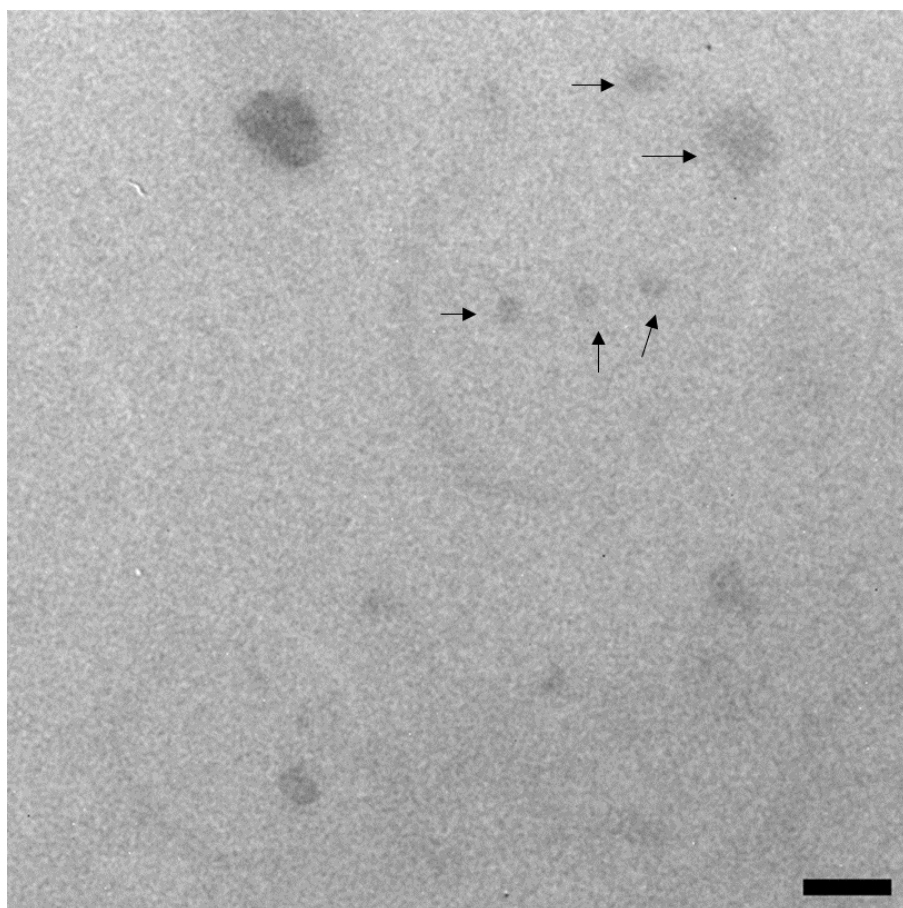

**Figure S1.** TEM micrograph of LTSL-BPNF, primary flakes loaded in the liposomes are below 20 nm. Scale bar 50 nm.

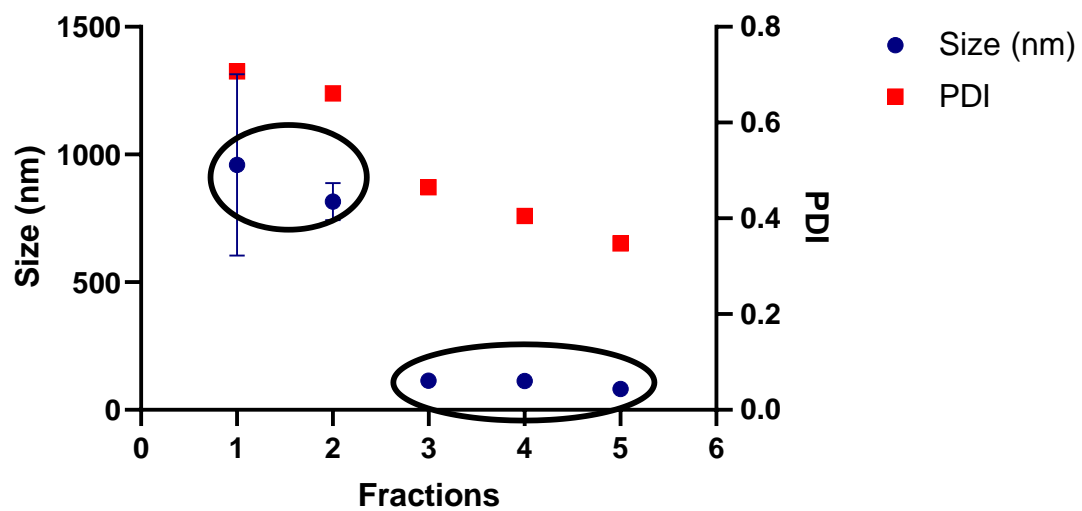

**Figure S2.** Colloidal properties of the eluted fractions of LTSL-BPNF after purification using a PD10 column.
